# Supplementary material
Source: publisher site journal article supplement (https://www.dovepress.com/article/437415)

**Appendix 1**

**RNA-seq**

Poly (A) mRNA was isolated using Beads (Invitrogen) with oligo (dT) after collecting total RNA. To fragment the mRNA and obtain short fragments, fragmentation buffer was added. Random hexamer primer were then used with these short fragments as templates to synthesize the first-strand cDNA. The second-strand cDNA was synthesized using buffer, dNTPs, RNase H, and DNA polymerase I. The short fragments were purified using the QIAQuick PCR Extraction Kit (Qiagen) and treated with EB buffer for end reparation and addition of poly(A) tails. Sequencing adaptors were connected to the short fragments. Suitable fragments were selected as templates for PCR amplification based on agarose gel electrophoresis. Finally, the library was sequenced using the HiSeq X TEN platform. FASTQ files were generated and sequencing reads aligned to human GRCh37/hg19 using the Omicsoft sequence aligner.1 Gene expression levels were quantified by upper quantile normalized fragments per kilobyte of transcript per million mapped reads (log10).

1. Hu J, Ge H, Newman M, Liu K. OSA: a fast and accurate alignment tool for RNA-Seq. *Bioinformatics*. 2012;28(14):1933-1934.

**Appendix 2**

**Immunohistochemistry and Immunoscore calculation**

The previous article has provided information on the methodology of immunohistochemistry and Immunoscore calculation.1 Surgical tissue specimens were prepared using paraffin blocks and then incubated with CD3 (2GV6, Ventana) and CD8 (C8/44, Dako) monoclonal antibodies at 4℃ for 24 hours. The EnVision system and DAB-chromogen (Dako) were applied, and methylene blue was used for counterstaining. High power magnification (20X) with the ZEISS Axio Scan.Z1 Slide Scanner (the University of Sydney, Bosch Institute) was used to examine sections. Three representative areas of the center of the tumor (CT) and invasive margin (IM) were captured respectively. The captured images were imported into ImagePro Plus software (Media Cybernetics) to quantify the number of CD3 and CD8 positive cells. The density of positive cells was recorded as the number of cells per mm2 of tissue surface.2 The mean density of the three areas of CT/IM was calculated for each section and used for analysis. The median cell density for all patients was used as the cutoff value to separate patients into different groups based on the extent of tumor infiltration.3 The cut-off thresholds for CD3 and CD8 cell densities were 189, 92 cells/mm2 in CT areas, and 474, 284 cells/mm2 in IM areas, respectively. Cell densities in both CT and IM areas were analyzed. A binary score (0 for low, 1 for high) was assigned for each immune cell type (CD3+ and CD8+) in CT and IM based on the predefined thresholds. The Immunoscore for each patient was calculated by summing the scores in CT and IM, resulting in a range of 0-4.4 Patients with an immunoscore ≥ 3 were classified as having a high immunoscore, while those with an immunoscore ≤ 2 were classified as having a low immunoscore.

1. Chen S, Feng S, Wei J, et al. Pretreatment prediction of immunoscore in hepatocellular cancer: a radiomics-based clinical model based on Gd-EOB-DTPA-enhanced MRI imaging. *Eur Radiol*. 2019;29(8):4177-4187.
2. Galon J, Costes A, Sanchez-Cabo F, et al. Type, density, and location of immune cells within human colorectal tumors predict clinical outcome. *Science*. 2006;313(5795):1960-1964.
3. Gabrielson A, Wu Y, Wang H, et al. Intratumoral CD3 and CD8 T-cell Densities Associated with Relapse-Free Survival in HCC. *Cancer Immunol Res*. 2016;4(5):419-430.
4. Galon J, Mlecnik B, Bindea G, et al. Towards the introduction of the 'Immunoscore' in the classification of malignant tumours. *J Pathol*. 2014;232(2):199-209.

Table S1 A Summary of features extracted by the Ultrasomics-Platform (Version 2.1, Ultrasomics Artificial Intelligence X-lab, Guangzhou) .

| Features Class | Sub-class | No. of Features | Total Number |
| --- | --- | --- | --- |
| Original[1] | First-order | 18 | 122 |
| GLCM | 23 |
| GLRLM | 16 |
| GLSZM | 16 |
| NGTDM | 5 |
| GLDM | 13 |
| Shape | 31 |
| Ipris | - | 48 | 48 |
| CoLIAGe [2] | - | 1170 | 1170 |
| Wavelets | - | 432 | 432 |
| shearlet | - | 2944 | 2944 |
| Gabors [3] | glbp | 120 | 1080 |
| gldp | 480 |
| gltp | 240 |
| gLTCoPs | 240 |
| PLBP[4]+WLLBP | - | 140 | 140 |
| Total | - | 5936 | 5936 |

1. <https://pyradiomics.readthedocs.io/en/latest/features.html>.
2. Prasanna P, Tiwari P, Madabhushi A. Co-occurrence of Local Anisotropic Gradient Orientations (CoLlAGe): A new radiomics descriptor. *Sci Rep*. 2016;6:37241.
3. Murala, S. and Q.M. Jonathan Wu, Local ternary co-occurrence patterns: A new feature descriptor for MRI and CT image retrieval. *Neurocomputing.* 2013. 119: p. 399-412.
4. Cai L, Wang X, Wang Y, Guo Y, Yu J, Wang Y. Robust phase-based texture descriptor for classification of breast ultrasound images. *Biomed Eng Online*. 2015;14:26.

**Appendix 3**

Tertiary lymphoid structures (TLS) are organized aggregates of immune cells that form postnatally in nonlymphoid tissues. With few exceptions, the presence of TLSs in tumors correlates with better prognosis and clinical outcome of immunotherapy.1 It has been demonstrated that TLS density correlates with that of CD8+ T cells and CD4+ T cells in tumors.2 In the cohort of 257 patients in our study, there were intra-tumor TLS in 140 patients (54.4%). The median GEP value was -0.384 (IQR: 0.578) in the TLS+ group and -0.665 (IQR: 0.362) in the TLS-group. There was a statistical difference in GEP values between the two groups (p < 0.01) (Figure S1).

Figure S1 Analysis of correlation between the GEP and the presence of TLS in the primary cohort. T cell-inflamed GEP of the TLS+ group (blue) was significantly higher than that of the TLS- group (red).


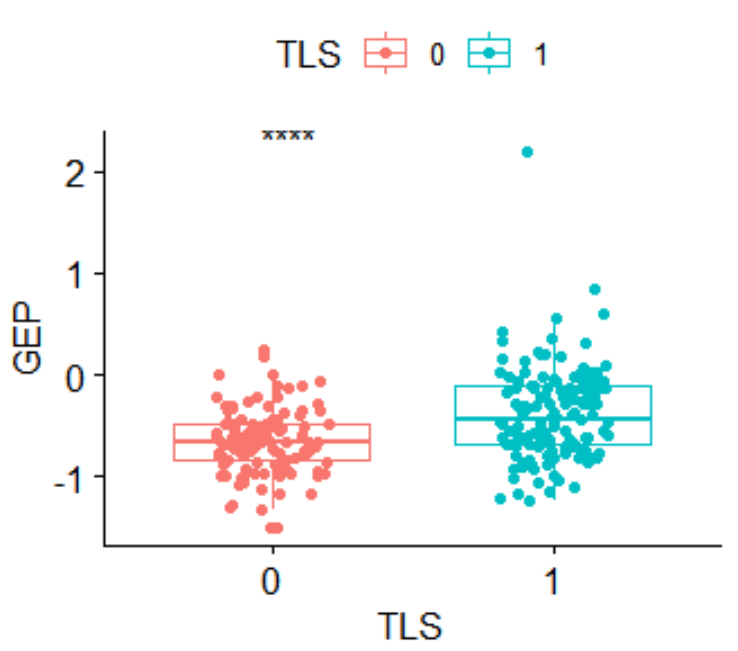


1. Schumacher TN, Thommen DS. Tertiary lymphoid structures in cancer. *Science*. 2022;375(6576):eabf9419.
2. Goc J, Germain C, Vo-Bourgais TK, et al. Dendritic cells in tumor-associated tertiary lymphoid structures signal a Th1 cytotoxic immune contexture and license the positive prognostic value of infiltrating CD8+ T cells. *Cancer Res*. 2014;74(3):705-715.

Table S2 Clinic-pathologic characteristics in the independent cohort

| Parameters | Total | Parameters | Total |
| --- | --- | --- | --- |
| Age, years, mean (SD) | 53.9(11.9) | PT, S |  |
| Gender |  | <14 | 43(93.5%) |
| Male | 40(87.0%) | >=14 | 3(6.5%) |
| Female | 6(13.0%) | TBIL, umol/L |  |
| Lesion size, cm, median (IQR)  Lesion number  1  ≥2  Liver cirrhosis  Positive  Negative | 5.1 (3.5,8.2)  21(45.7%)  25(54.3%)  36(78.3%)  10(21.7%) | <22  >=22  DBIL, umol/L  <7  >=7  ALB, g/L  <35  >=35 | 37(80.4%)  9(19.6%)  42(91.3%)  4(8.7%)  9(19.6%)  37(80.4%) |
| CEA, ug/L |  | ALT, U/L |  |
| <5 | 37(80.4%) | <40 | 22(47.8%) |
| >=5 | 9(19.6%) | >=40 | 24(52.2%) |
| AFP, ug/L |  | AST, U/L |  |
| <400 | 22(47.8%) | <37 | 15(32.6%) |
| >=400 | 24(52.2%) | >=37 | 31(67.4%) |
| HBsAg |  | ALP, U/L |  |
| Positive | 38(82.6%) | <110 | 29(63.0%) |
| Negative | 8(17.4%) | >=110 | 17(37.0%) |
| WBC, 10^9/L |  | GGT, U/L |  |
| <10 | 43(93.5%) | <50 | 15(32.6%) |
| >=10 | 3(6.5%) | >=50 | 31(67.4%) |
| NE% |  | BCLC stage |  |
| <0.75 | 45(97.8%) | 0 | 1(2.2%) |
| >=0.75 | 1(2.2%) | A | 14(30.4%) |
| PLT, 10^9/L |  | B | 8(17.4%) |
| <100 | 5(10.9%) | C | 23(50.0%) |
| >=100 | 41(89.1%) |  |  |

Continuous variables were presented in mean with standard deviation or median with interquartile rage. Categorical variables are presented as n (%). *SD*, standard deviation; *IQR*, inter-quartile range;

Table S3 The key features and their coefficients of the AP model

| Feature number | Feature name | Class | Coefficient |
| --- | --- | --- | --- |
| F112 | textural_phenotype_level_10-20% | Original | -0.284915234 |
| F159 | Ipris_shell2_gd_std | Ipris | 0.18199094 |
| F504 | CoLIAGe2D_WindowSize5_Sum Average_firstorder_Mean | CoLIAGe | -0.288652906 |
| F509 | CoLIAGe2D_WindowSize5_Sum Average_firstorder_RootMeanSquared | CoLIAGe | 0.128665492 |
| F596 | CoLIAGe2D_WindowSize5_Difference Entropy_firstorder_ Minimum | CoLIAGe | 0.639708812 |
| F772 | CoLIAGe2D_WindowSize7_Sum Entropy_firstorder_ Maximum | CoLIAGe | -0.940423835 |
| F967 | CoLIAGe2D_WindowSize9_Sum Average_firstorder_ Entropy | CoLIAGe | -0.579710153 |
| F1244 | CoLIAGe2D_WindowSize11_Sum Entropy_firstorder_ Minimum | CoLIAGe | 1.472448823 |
| F1382 | wavelet-LLH_lbp-3D-k_firstorder_InterquartileRange | Wavelets | -0.560098851 |
| F1561 | wavelet-HLH_lbp-3D-m1_firstorder_Entropy | Wavelets | -0.187639152 |
| F1579 | wavelet-HLH_lbp-3D-m2_firstorder_Entropy | Wavelets | -0.56667924 |
| F1835 | shearlet2DIdxs[ 1 1 -2]_glszm_GrayLevelNonUniformity Normalized | shearlet | -0.279645424 |
| F1934 | shearlet2DIdxs[ 1 1 -1]_glszm_LowGrayLevelZone Emphasis | shearlet | -0.665547615 |
| F2294 | shearlet2DIdxs[ 1 2 -2]_glszm_GrayLevelNonUniformity | shearlet | -0.452277039 |
| F2744 | shearlet2DIdxs[ 1 3 -4]_glrlm_RunVariance | shearlet | -0.090336406 |
| F3214 | shearlet2DIdxs[1 3 1]_glszm_GrayLevelNonUniformity | shearlet | 0.666718453 |
| F3402 | shearlet2DIdxs[1 3 3]_glszm_ZonePercentage | shearlet | 0.632623327 |
| F3611 | shearlet2DIdxs[ 2 1 -1]_gldm_SmallDependenceHighGray LevelEmphasis | shearlet | 0.124344612 |
| F3767 | shearlet2DIdxs[2 1 1]_glszm_GrayLevelNonUniformity Normalized | shearlet | -0.553376932 |
| F3770 | shearlet2DIdxs[2 1 1]_glszm_ZonePercentage | shearlet | -0.578464203 |
| F3960 | shearlet2DIdxs[2 2 0]_glszm_SmallAreaLowGrayLevel Emphasis | shearlet | -0.295848303 |
| F4087 | shearlet2DIdxs[ 2 3 -3]_firstorder_RootMeanSquared | shearlet | -0.524797305 |
| F4136 | shearlet2DIdxs[ 2 3 -3]_glszm_SizeZoneNonUniformity | shearlet | -0.24329869 |
| F4138 | shearlet2DIdxs[ 2 3 -3]_glszm_ZonePercentage | shearlet | -0.186223694 |
| F4143 | shearlet2DIdxs[ 2 3 -3]_glszm_HighGrayLevelZone Emphasis | shearlet | -0.218225695 |
| F4640 | shearlet2DIdxs[2 3 3]_firstorder_Skewness | shearlet | 0.528283286 |
| F4844 | gldp_hist_0_kernel0_6 | Gabors | 0.416723835 |
| F4917 | gldp_hist_0_kernel7_9 | Gabors | 0.228927827 |
| F5019 | gldp_hist_45_kernel6_1 | Gabors | 0.564998149 |
| F5103 | gldp_hist_90_kernel2_5 | Gabors | 0.595410277 |
| F5123 | gldp_hist_90_kernel4_5 | Gabors | -0.187576991 |
| F5232 | gldp_hist_135_kernel3_4 | Gabors | 1.252368849 |
| F5259 | gldp_hist_135_kernel6_1 | Gabors | 0.32211153 |
| F5310 | gldp_hist_135_kernel11_2 | Gabors | -0.461462434 |
| F5894 | WL_lbp_hist_cV2_6 | PLBP+WLLBP | -0.41976954 |
| F5897 | WL_lbp_hist_cV2_9 | PLBP+WLLBP | -0.732865322 |

Intercept: -0.000564

Figure S2 Radiomics feature selection of PVP model (**a**) or DP model (**b**) using LASSO regression in the primary cohort.


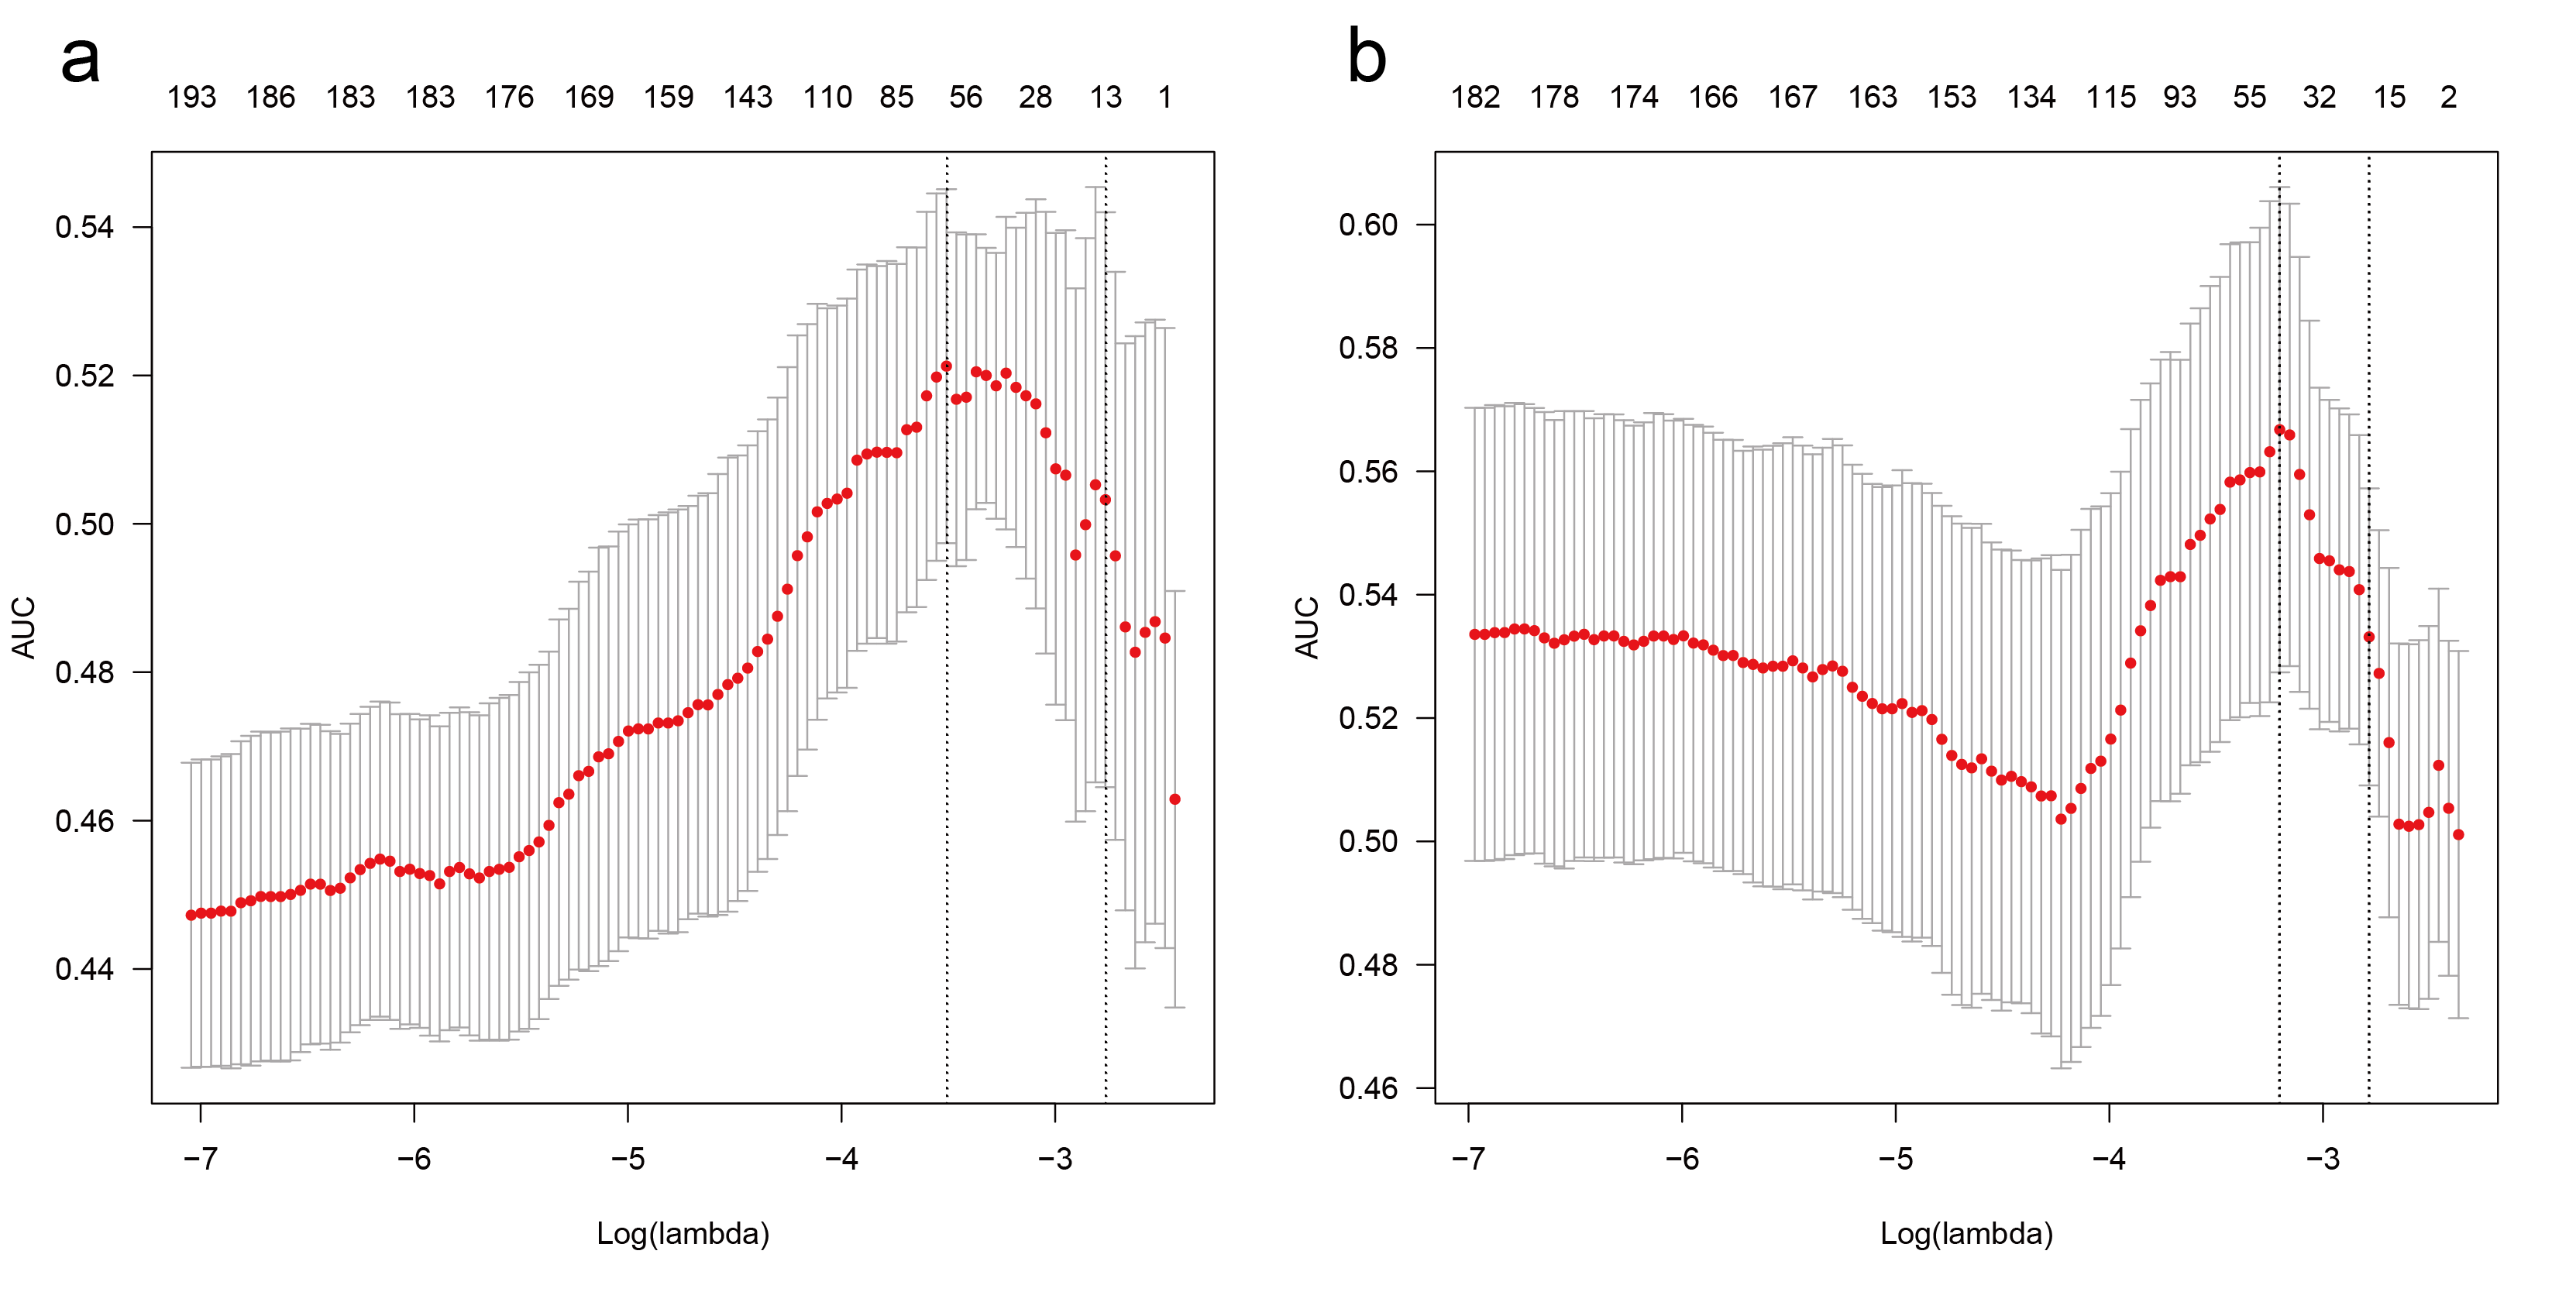


Table S4 The key features and their coefficients of the PVP model

| Feature number | Feature name | Class | Coefficient |
| --- | --- | --- | --- |
| F740 | CoLIAGe2D_WindowSize7_Sum Average_firstorder_Minimum | CoLIAGe | -0.324512052 |
| F1064 | CoLIAGe2D_WindowSize9_Difference Entropy_firstorder_ Minimum | CoLIAGe | -0.102234505 |
| F1210 | CoLIAGe2D_WindowSize11_Sum Average_firstorder_Robust MeanAbsoluteDeviation | CoLIAGe | -0.363710913 |
| F2118 | shearlet2DIdxs[1 1 1]_glszm_LowGrayLevelZoneEmphasis | shearlet | 0.339995562 |
| F2758 | shearlet2DIdxs[ 1 3 -4]_glszm_ZonePercentage | shearlet | -0.378852161 |
| F2845 | shearlet2DIdxs[ 1 3 -3]_glszm_LargeAreaEmphasis | shearlet | 0.086764525 |
| F3590 | shearlet2DIdxs[ 2 1 -1]_glszm_LowGrayLevelZoneEmphasis | shearlet | -0.325892205 |
| F3965 | shearlet2DIdxs[2 2 0]_ngtdm_Contrast | shearlet | -0.154209796 |
| F4043 | shearlet2DIdxs[2 2 1]_glszm_GrayLevelNonUniformity Normalized | shearlet | -0.123616095 |
| F4143 | shearlet2DIdxs[ 2 3 -3]_glszm_HighGrayLevelZoneEmphasis | shearlet | -0.077537049 |
| F4889 | gldp_hist_0_kernel5_1 | Gabors | 0.201782653 |
| F4913 | gldp_hist_0_kernel7_5 | Gabors | -0.559208288 |
| F5191 | gldp_hist_90_kernel11_3 | Gabors | -0.293964048 |

Intercept: -0.00752

Table S5 The key features and their coefficients of the DP model

| Feature number | Feature name | Class | Coefficient |
| --- | --- | --- | --- |
| F435 | CoLIAGe2D_WindowSize5_Contrast_firstorder_Range | CoLIAGe | -0.356022181 |
| F517 | CoLIAGe2D_WindowSize5_Sum Variance_firstorder_Entropy | CoLIAGe | 0.128468536 |
| F993 | CoLIAGe2D_WindowSize9_Sum Variance_firstorder_Range | CoLIAGe | -0.183386553 |
| F1442 | wavelet-LHL_lbp-3D-k_firstorder_Minimum | Wavelets | -0.041287702 |
| F1842 | shearlet2DIdxs[ 1 1 -2]_glszm_LowGrayLevelZoneEmphasis | shearlet | -0.113658194 |
| F1934 | shearlet2DIdxs[ 1 1 -1]_glszm_LowGrayLevelZoneEmphasis | shearlet | -0.309361942 |
| F2210 | shearlet2DIdxs[1 1 2]_glszm_LowGrayLevelZoneEmphasis | shearlet | -0.087655237 |
| F2493 | shearlet2DIdxs[1 2 0]_ngtdm_Contrast | shearlet | -0.161217341 |
| F2670 | shearlet2DIdxs[1 2 2]_glszm_LowGrayLevelZoneEmphasis | shearlet | -0.608513012 |
| F2845 | shearlet2DIdxs[ 1 3 -3]_glszm_LargeAreaEmphasis | shearlet | -0.00064716 |
| F3167 | shearlet2DIdxs[1 3 1]_firstorder_RootMeanSquared | shearlet | -0.436225109 |
| F3306 | shearlet2DIdxs[1 3 2]_glszm_GrayLevelNonUniformity | shearlet | -0.459545507 |
| F3459 | shearlet2DIdxs[1 3 4]_glcm_JointEntropy | shearlet | 0.205112039 |
| F3462 | shearlet2DIdxs[1 3 4]_glcm_Idm | shearlet | 0.767717353 |
| F3805 | shearlet2DIdxs[ 2 2 -1]_firstorder_MeanAbsoluteDeviation | shearlet | -0.517186501 |
| F4232 | shearlet2DIdxs[ 2 3 -2]_glszm_ZoneVariance | shearlet | 0.432626031 |
| F4973 | gldp_hist_45_kernel1_5 | Gabors | -1.142234402 |
| F5129 | gldp_hist_90_kernel5_1 | Gabors | 0.36819745 |
| F5274 | gldp_hist_135_kernel7_6 | Gabors | -0.271874944 |

Intercept: -0.113854

Table S6 The coefficients of the integrated model

| Factor | AP model prediction value | PVP model prediction value | DP model prediction value |
| --- | --- | --- | --- |
| Coefficient | 0.9321 | 0.8148 | 0.3973 |

Intercept: 0.0668

Table S7 Performance of the four Models

| Model | Number of features | AUC | Sensitivity | Specificity | Accuracy | P value |
| --- | --- | --- | --- | --- | --- | --- |
| AP model | 36 | 0.889 | 0.799 | 0.828 | 0.813 | P1<0.01 |
| PVP model | 13 | 0.740 | 0.769 | 0.597 | 0.683 |  |
| DP model | 19 | 0.812 | 0.771 | 0.722 | 0.746 | P2=0.02 |
| integrated model | 68 | 0.923 | 0.870 | 0.850 | 0.860 | P3=0.20 |

The p-value indicates the result of the DeLong test of a comparison between the AP model and the other three models. P1: AP model vs PVP model, P2: AP model vs DP model, P3: AP model vs integrated model

Figure S3 ROC of PVP model (**a**), DP model (**b**) and integrated model (**c**) for 5-fold cross-validation.


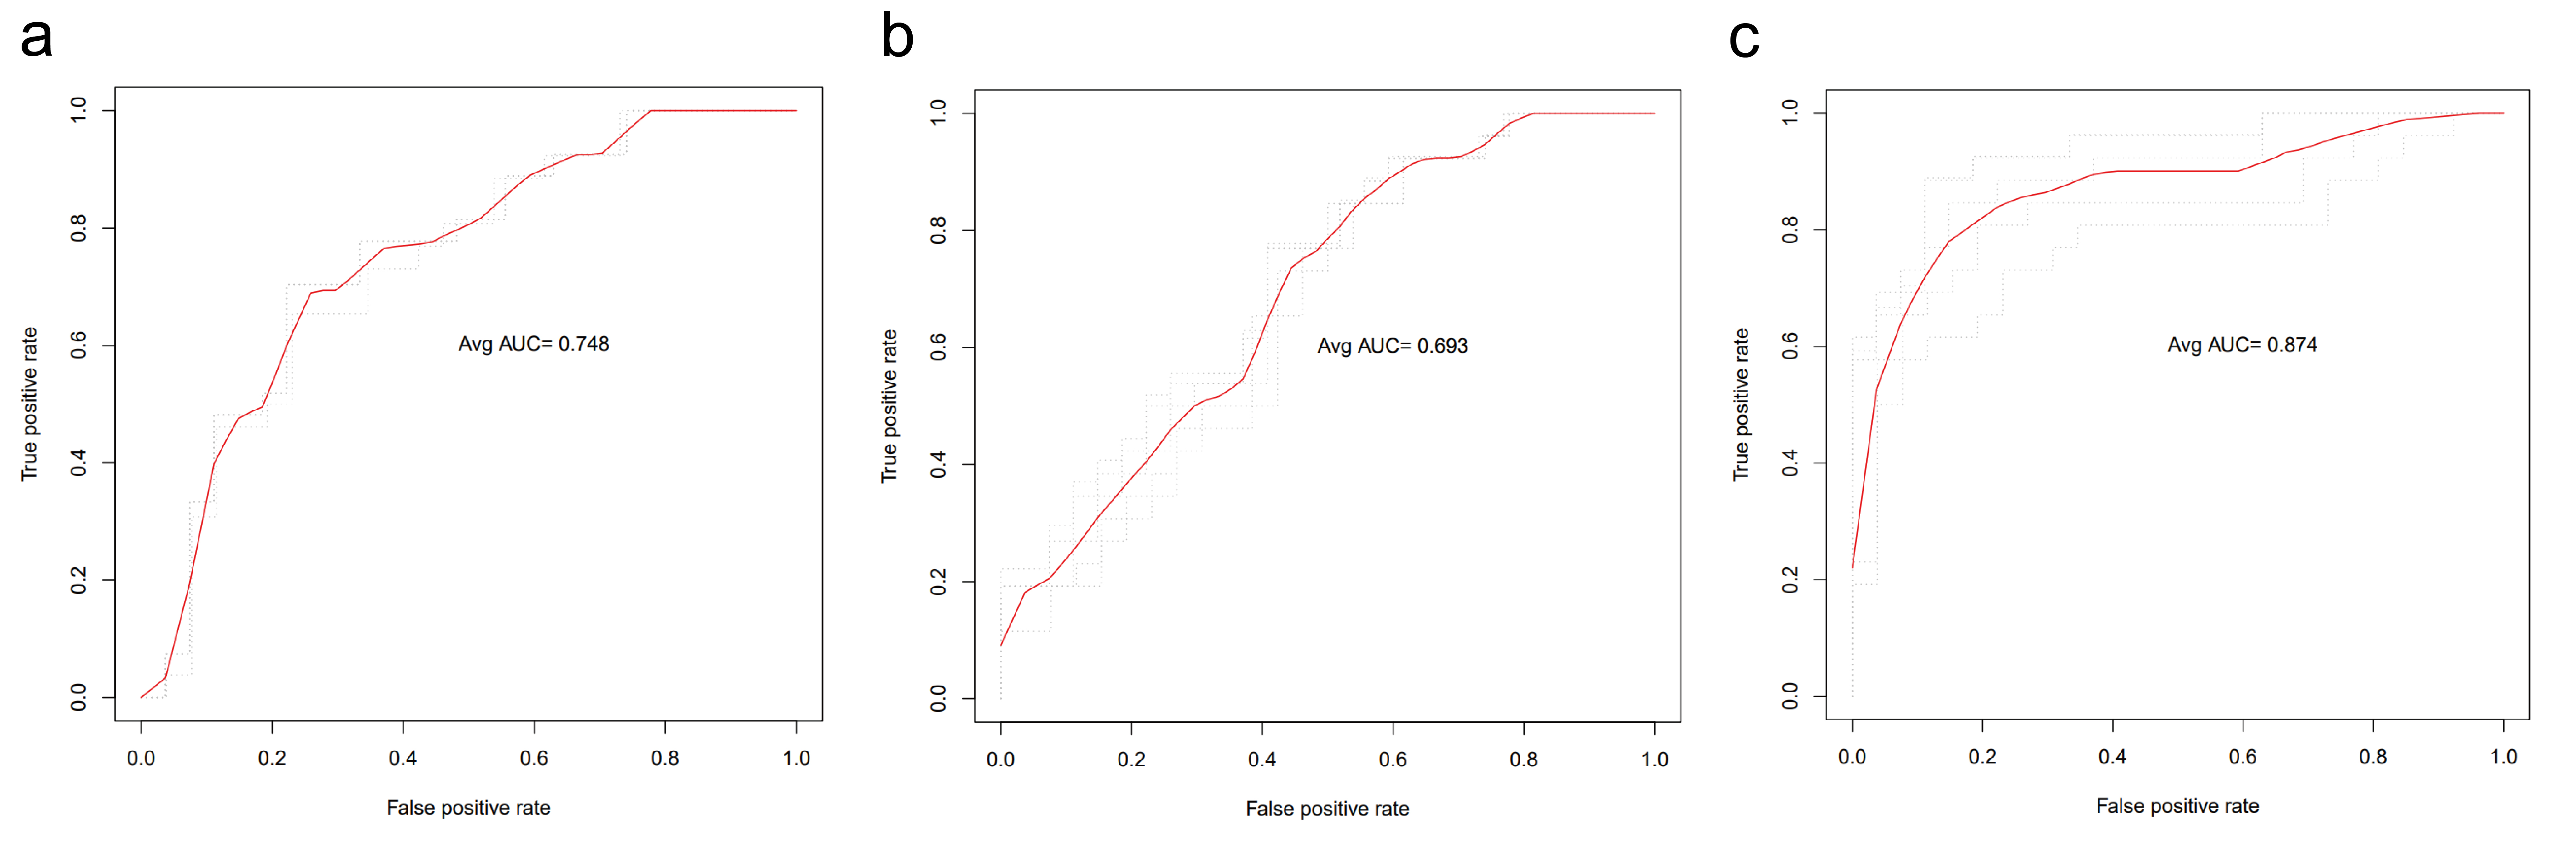

Supplement: Supplementary file 1 [file get_supplementary_file.php]
